# Supplementary material for: Linking Anthropogenic Landscape Perturbation to Herbivory and Pathogen Leaf Damage in Tropical Tree Communities
Source: MDPI journal article supplement (doi:10.3390/plants12223839), 2023-11-13
Supplement: s1 [file s1]

**Table S3.** Incidence of symptoms related to pathogens in the species studied at the research sites.

This data frame serves as the basis for various analyses, including interaction webs, non-metric multidimensional scaling (NMDS), and Generalized Linear Mixed Model (GLMM) analyses, all of which are aimed at understanding the distribution and incidence of plant symptoms related to pathogens among different species in our study.

| Plot | Species | Antracnose | Mildew | Chlorosis | Curling | Local lesions | Ringspots | Fungus spot | Mosaic | Necrosis | Rust | Black spots |
|------|---------|------------|--------|-----------|---------|---------------|-----------|-------------|--------|----------|------|-------------|
| Cao1 | Acacor  | 1          | 0      | 1         | 0       | 0             | 0         | 1           | 0      | 0        | 1    | 0           |
| Cao1 | Allcom  | 0          | 0      | 1         | 0       | 0             | 0         | 1           | 0      | 0        | 0    | 0           |
| Cao1 | Annret  | 1          | 0      | 1         | 0       | 1             | 1         | 1           | 1      | 0        | 1    | 1           |
| Cao1 | Bursim  | 1          | 0      | 1         | 1       | 1             | 1         | 1           | 1      | 1        | 1    | 0           |
| Cao1 | Eugiba  | 1          | 0      | 0         | 0       | 1             | 1         | 1           | 0      | 0        | 1    | 1           |
| Cao1 | Eugwin  | 0          | 0      | 0         | 0       | 0             | 0         | 1           | 1      | 0        | 0    | 0           |
| Cao1 | Guecom  | 1          | 0      | 0         | 0       | 1             | 0         | 1           | 0      | 0        | 1    | 0           |
| Cao1 | Loncas  | 1          | 0      | 0         | 0       | 1             | 0         | 1           | 1      | 0        | 0    | 0           |
| Cao1 | Lonrug  | 1          | 0      | 1         | 1       | 1             | 0         | 1           | 0      | 0        | 1    | 0           |
| Cao1 | Manzap  | 0          | 0      | 1         | 0       | 0             | 1         | 1           | 0      | 0        | 0    | 0           |
| Cao1 | Necsal  | 1          | 0      | 1         | 0       | 0             | 0         | 1           | 0      | 1        | 1    | 0           |
| Cao1 | Poucarn | 1          | 0      | 0         | 1       | 1             | 0         | 1           | 0      | 0        | 1    | 1           |
| Cao1 | Swacub  | 1          | 0      | 1         | 0       | 1             | 1         | 1           | 1      | 0        | 0    | 1           |
| Cao1 | Trigla  | 1          | 0      | 0         | 0       | 1             | 0         | 1           | 1      | 0        | 1    | 0           |
| Cao1 | Trorac  | 1          | 0      | 0         | 0       | 0             | 0         | 1           | 0      | 0        | 0    | 0           |
| Cao2 | Broali  | 1          | 0      | 0         | 1       | 0             | 1         | 1           | 0      | 0        | 1    | 0           |
| Cao2 | Drylat  | 0          | 0      | 1         | 0       | 1             | 0         | 1           | 0      | 0        | 0    | 0           |
| Cao2 | Eugiba  | 1          | 0      | 0         | 1       | 0             | 0         | 1           | 0      | 0        | 1    | 0           |
| Cao2 | Exodip  | 1          | 0      | 0         | 1       | 1             | 0         | 1           | 0      | 0        | 0    | 0           |
| Cao2 | Manzap  | 0          | 0      | 1         | 1       | 1             | 1         | 1           | 0      | 0        | 1    | 0           |
| Cao2 | Metbro  | 0          | 0      | 0         | 0       | 1             | 0         | 1           | 0      | 0        | 1    | 1           |
| Cao2 | Mosdep  | 1          | 0      | 0         | 1       | 0             | 0         | 1           | 1      | 0        | 1    | 1           |
| Cao2 | Pimdio  | 0          | 0      | 0         | 0       | 1             | 0         | 1           | 0      | 0        | 1    | 1           |

|      |         |   |   |   |   |   |   |   |   |   |   |   |
|------|---------|---|---|---|---|---|---|---|---|---|---|---|
| Cao2 | Pouamy  | 0 | 0 | 0 | 0 | 0 | 0 | 1 | 0 | 0 | 0 | 0 |
| Cao2 | Poucarn | 1 | 0 | 0 | 1 | 1 | 1 | 1 | 0 | 0 | 1 | 1 |
| Cao2 | Procop  | 1 | 0 | 1 | 0 | 1 | 0 | 1 | 1 | 0 | 1 | 0 |
| Cao2 | Pseell  | 0 | 0 | 0 | 0 | 0 | 0 | 1 | 1 | 0 | 1 | 0 |
| Cao2 | Psespu  | 1 | 0 | 0 | 0 | 1 | 0 | 1 | 0 | 1 | 1 | 0 |
| Cao2 | Simama  | 1 | 0 | 1 | 0 | 1 | 0 | 1 | 0 | 0 | 0 | 0 |
| CCol | Acagau  | 1 | 0 | 1 | 0 | 1 | 0 | 1 | 0 | 0 | 0 | 0 |
| CCol | Coccoz  | 1 | 0 | 0 | 1 | 1 | 0 | 1 | 1 | 0 | 1 | 1 |
| CCol | Croarb  | 1 | 0 | 1 | 0 | 1 | 0 | 1 | 0 | 1 | 1 | 1 |
| CCol | Eugwin  | 1 | 0 | 1 | 0 | 1 | 0 | 1 | 0 | 0 | 0 | 1 |
| CCol | Gymflo  | 1 | 0 | 0 | 0 | 1 | 0 | 1 | 0 | 1 | 0 | 0 |
| CCol | Longua  | 1 | 0 | 0 | 1 | 1 | 0 | 0 | 0 | 1 | 0 | 1 |
| CCol | Lyslat  | 1 | 0 | 0 | 0 | 1 | 0 | 0 | 0 | 0 | 0 | 0 |
| CCol | Necsal  | 1 | 0 | 0 | 0 | 1 | 0 | 1 | 0 | 1 | 0 | 1 |
| CCol | Thopau  | 1 | 0 | 1 | 0 | 1 | 0 | 1 | 1 | 0 | 0 | 0 |
| CCol | Vitgau  | 1 | 0 | 0 | 0 | 1 | 0 | 1 | 0 | 1 | 0 | 0 |
| CNor | Acacen  | 0 | 0 | 1 | 0 | 0 | 0 | 0 | 0 | 0 | 0 | 0 |
| CNor | Acagau  | 0 | 0 | 1 | 0 | 1 | 0 | 0 | 0 | 0 | 0 | 0 |
| CNor | Broali  | 1 | 0 | 1 | 0 | 1 | 0 | 0 | 0 | 0 | 0 | 0 |
| CNor | Bursim  | 1 | 0 | 1 | 0 | 1 | 0 | 0 | 0 | 0 | 0 | 0 |
| CNor | Casgau  | 0 | 0 | 1 | 0 | 1 | 0 | 1 | 1 | 0 | 0 | 1 |
| CNor | Cocref  | 1 | 0 | 1 | 0 | 1 | 0 | 1 | 0 | 0 | 0 | 0 |
| CNor | Corall  | 1 | 0 | 0 | 0 | 1 | 0 | 1 | 0 | 0 | 0 | 1 |
| CNor | Croicc  | 1 | 0 | 1 | 0 | 1 | 0 | 1 | 0 | 0 | 1 | 0 |
| CNor | Diosal  | 0 | 0 | 1 | 0 | 1 | 0 | 0 | 1 | 0 | 0 | 0 |
| CNor | Drylat  | 1 | 0 | 0 | 0 | 1 | 0 | 1 | 0 | 0 | 0 | 1 |
| CNor | Eugiba  | 1 | 0 | 0 | 1 | 1 | 0 | 1 | 0 | 0 | 1 | 0 |
| CNor | Guecom  | 0 | 0 | 1 | 1 | 1 | 0 | 1 | 0 | 0 | 0 | 1 |
| CNor | Guegau  | 1 | 0 | 0 | 0 | 1 | 0 | 0 | 0 | 0 | 0 | 0 |

|      |        |   |   |   |   |   |   |   |   |   |   |   |
|------|--------|---|---|---|---|---|---|---|---|---|---|---|
| CNor | Gymflo | 1 | 0 | 1 | 0 | 1 | 0 | 0 | 0 | 0 | 0 | 0 |
| CNor | Liccor | 1 | 0 | 1 | 1 | 1 | 0 | 0 | 0 | 1 | 0 | 1 |
| CNor | Longua | 1 | 0 | 1 | 1 | 1 | 0 | 0 | 0 | 0 | 0 | 0 |
| CNor | Lonyuc | 1 | 0 | 1 | 0 | 1 | 0 | 1 | 1 | 0 | 0 | 0 |
| CNor | Manzap | 1 | 0 | 0 | 1 | 1 | 0 | 0 | 0 | 0 | 0 | 1 |
| CNor | Metbro | 1 | 0 | 1 | 0 | 1 | 0 | 0 | 0 | 0 | 0 | 0 |
| CNor | Mosdep | 1 | 0 | 1 | 0 | 1 | 0 | 1 | 1 | 0 | 0 | 0 |
| CNor | Necsal | 1 | 0 | 1 | 0 | 1 | 0 | 1 | 1 | 0 | 1 | 1 |
| CNor | Neoema | 1 | 0 | 0 | 0 | 1 | 0 | 1 | 0 | 0 | 0 | 0 |
| CNor | Pispis | 1 | 0 | 1 | 1 | 1 | 0 | 0 | 0 | 0 | 0 | 0 |
| CNor | Sebade | 1 | 0 | 1 | 0 | 1 | 0 | 0 | 0 | 0 | 0 | 0 |
| CNor | Thopau | 1 | 0 | 1 | 0 | 1 | 0 | 1 | 1 | 0 | 0 | 0 |
| CNor | Trihav | 1 | 0 | 0 | 0 | 1 | 0 | 1 | 1 | 0 | 0 | 0 |
| CNor | Vitgau | 1 | 0 | 0 | 0 | 1 | 0 | 0 | 0 | 0 | 0 | 1 |
| CNor | Zuegui | 1 | 0 | 0 | 0 | 1 | 0 | 1 | 0 | 0 | 0 | 0 |
| CRej | Allcom | 1 | 0 | 1 | 0 | 0 | 0 | 1 | 1 | 0 | 0 | 0 |
| CRej | Annret | 1 | 0 | 0 | 0 | 0 | 0 | 1 | 0 | 0 | 0 | 0 |
| CRej | Astgra | 1 | 0 | 1 | 1 | 1 | 0 | 1 | 0 | 0 | 0 | 0 |
| CRej | Broali | 1 | 0 | 1 | 0 | 0 | 0 | 1 | 0 | 0 | 0 | 1 |
| CRej | Celtri | 1 | 0 | 1 | 0 | 0 | 0 | 1 | 0 | 0 | 0 | 0 |
| CRej | Diosal | 0 | 0 | 0 | 0 | 0 | 0 | 0 | 1 | 0 | 0 | 0 |
| CRej | Drylat | 1 | 0 | 1 | 0 | 0 | 0 | 1 | 1 | 0 | 1 | 1 |
| CRej | Krufer | 1 | 0 | 0 | 0 | 0 | 0 | 1 | 0 | 0 | 0 | 0 |
| CRej | Meloli | 1 | 0 | 1 | 0 | 0 | 0 | 1 | 0 | 0 | 0 | 0 |
| CRej | Neecho | 1 | 0 | 1 | 0 | 1 | 0 | 1 | 1 | 0 | 0 | 0 |
| CRej | Pouret | 1 | 0 | 1 | 0 | 1 | 0 | 1 | 1 | 0 | 0 | 1 |
| CRej | Simama | 1 | 0 | 1 | 0 | 0 | 0 | 1 | 0 | 0 | 0 | 0 |
| CRej | Vitgau | 1 | 0 | 0 | 0 | 0 | 0 | 1 | 0 | 0 | 0 | 0 |
| CRej | Zuegui | 1 | 0 | 0 | 1 | 1 | 0 | 0 | 1 | 0 | 0 | 0 |

|      |         |   |   |   |   |   |   |   |   |   |   |   |
|------|---------|---|---|---|---|---|---|---|---|---|---|---|
| K120 | Bursim  | 0 | 0 | 0 | 0 | 1 | 0 | 1 | 1 | 1 | 0 | 0 |
| K120 | Caemol  | 1 | 0 | 0 | 0 | 1 | 0 | 1 | 1 | 1 | 1 | 0 |
| K120 | Croarb  | 1 | 0 | 0 | 0 | 1 | 0 | 1 | 0 | 1 | 1 | 0 |
| K120 | Croper  | 0 | 0 | 0 | 0 | 1 | 0 | 1 | 0 | 0 | 1 | 1 |
| K120 | Eseber  | 1 | 0 | 0 | 0 | 1 | 0 | 1 | 0 | 0 | 0 | 1 |
| K120 | Gymflo  | 1 | 0 | 0 | 0 | 1 | 0 | 1 | 0 | 1 | 0 | 1 |
| K120 | Longua  | 1 | 0 | 0 | 0 | 1 | 0 | 1 | 1 | 1 | 1 | 0 |
| K120 | Lonyuc  | 1 | 0 | 0 | 0 | 1 | 0 | 1 | 1 | 0 | 0 | 1 |
| K120 | Neoema  | 1 | 0 | 0 | 0 | 1 | 0 | 1 | 0 | 0 | 0 | 0 |
| K120 | Sidsal  | 1 | 0 | 0 | 0 | 1 | 0 | 1 | 0 | 0 | 0 | 1 |
| NBe1 | Bauidiv | 1 | 0 | 0 | 0 | 0 | 1 | 1 | 0 | 1 | 0 | 1 |
| NBe1 | Broali  | 1 | 0 | 1 | 0 | 0 | 0 | 1 | 0 | 0 | 1 | 0 |
| NBe1 | Bursim  | 1 | 0 | 0 | 0 | 1 | 0 | 0 | 0 | 0 | 0 | 0 |
| NBe1 | Cosspe  | 1 | 0 | 0 | 0 | 0 | 0 | 1 | 0 | 0 | 0 | 0 |
| NBe1 | Krufer  | 1 | 0 | 0 | 1 | 1 | 1 | 1 | 0 | 0 | 1 | 1 |
| NBe1 | Loncas  | 1 | 0 | 0 | 0 | 1 | 0 | 0 | 1 | 0 | 0 | 0 |
| NBe1 | Mosdep  | 1 | 0 | 0 | 1 | 0 | 0 | 0 | 0 | 0 | 0 | 0 |
| NBe1 | Necsal  | 1 | 0 | 0 | 0 | 1 | 0 | 1 | 1 | 0 | 0 | 0 |
| NBe1 | Neecho  | 1 | 0 | 1 | 0 | 1 | 0 | 1 | 0 | 0 | 0 | 0 |
| NBe1 | Poucam  | 1 | 0 | 1 | 0 | 1 | 0 | 1 | 1 | 0 | 0 | 1 |
| NBe1 | Pouret  | 1 | 0 | 0 | 1 | 1 | 0 | 1 | 0 | 0 | 0 | 1 |
| NBe1 | Procop  | 1 | 0 | 0 | 0 | 1 | 0 | 1 | 0 | 1 | 0 | 1 |
| NBe1 | Pseell  | 0 | 0 | 0 | 0 | 1 | 0 | 0 | 0 | 0 | 0 | 0 |
| NBe1 | Psespu  | 1 | 0 | 1 | 1 | 1 | 0 | 1 | 0 | 0 | 1 | 0 |
| NBe1 | Ranlon  | 1 | 0 | 1 | 0 | 1 | 1 | 1 | 0 | 0 | 0 | 0 |
| NBe1 | Sidflo  | 1 | 0 | 0 | 0 | 1 | 0 | 0 | 0 | 0 | 0 | 0 |
| NBe1 | Sidobt  | 1 | 0 | 0 | 0 | 0 | 0 | 1 | 0 | 0 | 0 | 0 |
| NBe1 | Sidsal  | 1 | 0 | 1 | 0 | 0 | 0 | 1 | 0 | 0 | 0 | 0 |
| NBe1 | Trimin  | 0 | 0 | 1 | 1 | 1 | 0 | 0 | 1 | 0 | 0 | 0 |

|      |         |   |   |   |   |   |   |   |   |   |   |   |
|------|---------|---|---|---|---|---|---|---|---|---|---|---|
| NBe2 | Bursim  | 1 | 0 | 1 | 1 | 1 | 0 | 1 | 1 | 0 | 0 | 0 |
| NBe2 | Casgau  | 1 | 0 | 0 | 0 | 1 | 0 | 1 | 0 | 0 | 0 | 0 |
| NBe2 | Cocspi  | 1 | 0 | 0 | 1 | 1 | 1 | 1 | 0 | 1 | 0 | 0 |
| NBe2 | Croarb  | 1 | 0 | 1 | 0 | 0 | 0 | 1 | 0 | 0 | 1 | 1 |
| NBe2 | Denarb  | 0 | 0 | 0 | 0 | 1 | 0 | 1 | 1 | 0 | 0 | 0 |
| NBe2 | Guecom  | 1 | 0 | 0 | 0 | 1 | 0 | 1 | 0 | 0 | 1 | 1 |
| NBe2 | Longua  | 1 | 0 | 0 | 0 | 0 | 0 | 1 | 0 | 0 | 1 | 0 |
| NBe2 | Lyslat  | 0 | 0 | 0 | 0 | 1 | 0 | 1 | 0 | 0 | 0 | 1 |
| NBe2 | Necsal  | 1 | 0 | 0 | 0 | 0 | 0 | 1 | 1 | 0 | 1 | 0 |
| NBe2 | Poucarn | 1 | 0 | 1 | 0 | 1 | 0 | 1 | 0 | 0 | 0 | 0 |
| NBe2 | Thopau  | 1 | 0 | 0 | 0 | 1 | 0 | 1 | 0 | 0 | 1 | 0 |
| NBe2 | Vitgau  | 0 | 0 | 0 | 0 | 1 | 0 | 0 | 0 | 0 | 0 | 0 |
| RCa1 | Acagau  | 0 | 0 | 1 | 1 | 0 | 0 | 0 | 0 | 0 | 1 | 0 |
| RCa1 | Broali  | 1 | 0 | 1 | 0 | 1 | 0 | 1 | 0 | 0 | 1 | 0 |
| RCa1 | Casgau  | 1 | 0 | 1 | 0 | 1 | 0 | 1 | 0 | 0 | 0 | 0 |
| RCa1 | Drylat  | 1 | 1 | 0 | 0 | 1 | 0 | 1 | 1 | 0 | 1 | 1 |
| RCa1 | Eryrot  | 0 | 0 | 0 | 0 | 1 | 1 | 1 | 0 | 0 | 0 | 0 |
| RCa1 | Eugwin  | 1 | 0 | 1 | 0 | 1 | 0 | 1 | 1 | 0 | 0 | 1 |
| RCa1 | Gymflo  | 1 | 0 | 1 | 1 | 1 | 0 | 1 | 1 | 0 | 0 | 1 |
| RCa1 | Krufer  | 1 | 0 | 0 | 0 | 1 | 0 | 1 | 0 | 0 | 1 | 1 |
| RCa1 | Lonyuc  | 1 | 0 | 1 | 0 | 0 | 0 | 1 | 0 | 0 | 1 | 0 |
| RCa1 | Manzap  | 1 | 0 | 1 | 1 | 1 | 1 | 1 | 0 | 0 | 1 | 0 |
| RCa1 | Mosdep  | 0 | 0 | 0 | 0 | 1 | 0 | 1 | 1 | 0 | 1 | 0 |
| RCa1 | Thopau  | 1 | 0 | 1 | 0 | 0 | 0 | 1 | 0 | 0 | 0 | 0 |
| RCa2 | Acacen  | 1 | 0 | 0 | 0 | 1 | 0 | 1 | 0 | 0 | 0 | 0 |
| RCa2 | Amyele  | 1 | 0 | 0 | 0 | 1 | 0 | 1 | 0 | 1 | 0 | 0 |
| RCa2 | Broali  | 1 | 0 | 1 | 0 | 0 | 0 | 1 | 0 | 0 | 0 | 0 |
| RCa2 | Capind  | 1 | 0 | 0 | 0 | 1 | 0 | 1 | 1 | 0 | 1 | 0 |
| RCa2 | Croarb  | 1 | 0 | 0 | 0 | 1 | 0 | 1 | 0 | 0 | 1 | 0 |

|      |         |   |   |   |   |   |   |   |   |   |   |   |
|------|---------|---|---|---|---|---|---|---|---|---|---|---|
| RCa2 | Drylat  | 1 | 0 | 0 | 1 | 1 | 0 | 0 | 1 | 0 | 0 | 0 |
| RCa2 | Eseber  | 1 | 1 | 1 | 0 | 1 | 0 | 1 | 1 | 0 | 0 | 0 |
| RCa2 | Eugiba  | 1 | 0 | 1 | 0 | 1 | 0 | 1 | 1 | 0 | 0 | 0 |
| RCa2 | Eugwin  | 1 | 0 | 0 | 0 | 1 | 0 | 1 | 0 | 0 | 0 | 0 |
| RCa2 | Exodip  | 1 | 0 | 0 | 0 | 1 | 0 | 1 | 0 | 0 | 0 | 1 |
| RCa2 | Guasan  | 1 | 0 | 0 | 1 | 1 | 0 | 1 | 1 | 0 | 0 | 0 |
| RCa2 | Krufer  | 1 | 0 | 1 | 0 | 1 | 0 | 1 | 0 | 1 | 0 | 0 |
| RCa2 | Longua  | 1 | 1 | 1 | 0 | 1 | 0 | 1 | 1 | 0 | 0 | 0 |
| RCa2 | Lonyuc  | 1 | 0 | 0 | 0 | 0 | 0 | 1 | 0 | 0 | 0 | 0 |
| RCa2 | Manzap  | 1 | 0 | 1 | 0 | 1 | 0 | 1 | 0 | 0 | 0 | 0 |
| RCa2 | Mosdep  | 1 | 0 | 1 | 1 | 1 | 0 | 1 | 1 | 0 | 0 | 0 |
| RCa2 | Neecho  | 1 | 0 | 1 | 0 | 1 | 0 | 1 | 1 | 0 | 1 | 0 |
| RCa2 | Thopau  | 1 | 0 | 1 | 0 | 1 | 1 | 1 | 1 | 1 | 0 | 0 |
| RCa3 | Aspdes  | 0 | 0 | 1 | 0 | 0 | 1 | 1 | 0 | 0 | 0 | 0 |
| RCa3 | Eugiba  | 1 | 0 | 1 | 0 | 1 | 0 | 1 | 1 | 0 | 0 | 0 |
| RCa3 | Exocar  | 1 | 0 | 1 | 0 | 0 | 0 | 1 | 0 | 0 | 0 | 0 |
| RCa3 | Hanchr  | 1 | 0 | 1 | 0 | 1 | 1 | 1 | 0 | 0 | 0 | 0 |
| RCa3 | Manzap  | 1 | 0 | 0 | 1 | 0 | 0 | 1 | 0 | 0 | 0 | 1 |
| RCa3 | Mosdep  | 1 | 0 | 1 | 0 | 0 | 1 | 1 | 0 | 0 | 0 | 1 |
| RCa3 | Myrflo  | 1 | 0 | 0 | 0 | 1 | 1 | 1 | 0 | 0 | 0 | 0 |
| RCa3 | Pouamy  | 1 | 0 | 1 | 0 | 0 | 1 | 1 | 0 | 1 | 0 | 0 |
| RCa3 | Poucarn | 1 | 0 | 0 | 0 | 0 | 1 | 1 | 0 | 1 | 0 | 1 |
| RCa3 | Pouret  | 1 | 0 | 1 | 0 | 0 | 1 | 1 | 0 | 0 | 0 | 0 |
| RCa3 | Psespu  | 1 | 0 | 0 | 0 | 1 | 0 | 1 | 0 | 0 | 0 | 0 |
| RCa3 | Trimin  | 1 | 0 | 1 | 1 | 1 | 0 | 1 | 1 | 0 | 0 | 0 |
| RCa3 | Vitgau  | 1 | 0 | 0 | 0 | 1 | 0 | 0 | 0 | 0 | 0 | 0 |
| SRos | Baudiv  | 1 | 0 | 0 | 1 | 1 | 0 | 1 | 1 | 0 | 0 | 0 |
| SRos | Bursim  | 1 | 0 | 1 | 0 | 1 | 0 | 1 | 0 | 0 | 0 | 1 |
| SRos | Cupbel  | 1 | 0 | 0 | 0 | 1 | 0 | 1 | 0 | 0 | 1 | 0 |

|      |        |   |   |   |   |   |   |   |   |   |   |   |
|------|--------|---|---|---|---|---|---|---|---|---|---|---|
| SRos | Denarb | 1 | 0 | 1 | 0 | 1 | 0 | 1 | 1 | 0 | 0 | 0 |
| SRos | Dioyat | 1 | 0 | 0 | 1 | 0 | 0 | 1 | 0 | 0 | 0 | 1 |
| SRos | Drylat | 0 | 0 | 1 | 0 | 0 | 0 | 1 | 0 | 0 | 1 | 0 |
| SRos | Eryrot | 0 | 0 | 1 | 0 | 1 | 0 | 1 | 1 | 0 | 0 | 0 |
| SRos | Guecom | 0 | 0 | 0 | 0 | 1 | 0 | 1 | 0 | 0 | 0 | 0 |
| SRos | Longua | 1 | 0 | 1 | 0 | 1 | 0 | 1 | 0 | 0 | 0 | 0 |
| SRos | Mosdep | 1 | 0 | 1 | 0 | 0 | 0 | 1 | 0 | 0 | 0 | 0 |
| SRos | Necsal | 1 | 0 | 1 | 0 | 0 | 0 | 1 | 1 | 0 | 1 | 1 |
| SRos | Pispis | 1 | 0 | 0 | 1 | 1 | 0 | 0 | 0 | 0 | 0 | 0 |
| SRos | Sidsal | 1 | 0 | 1 | 0 | 0 | 0 | 1 | 1 | 0 | 0 | 0 |
| SRos | Spomom | 0 | 0 | 0 | 0 | 1 | 0 | 0 | 0 | 0 | 0 | 0 |
| SRos | Swacub | 1 | 0 | 0 | 0 | 1 | 0 | 1 | 0 | 0 | 0 | 0 |
| SRos | Trigla | 0 | 0 | 0 | 0 | 0 | 0 | 1 | 0 | 0 | 0 | 0 |
| VNov | Acacen | 0 | 0 | 1 | 0 | 0 | 0 | 0 | 0 | 0 | 0 | 0 |
| VNov | Acagau | 1 | 0 | 1 | 0 | 1 | 0 | 1 | 0 | 0 | 0 | 0 |
| VNov | Allcom | 0 | 0 | 0 | 0 | 0 | 0 | 1 | 0 | 0 | 0 | 0 |
| VNov | Braber | 1 | 0 | 1 | 0 | 1 | 0 | 1 | 1 | 0 | 0 | 0 |
| VNov | Broali | 1 | 0 | 1 | 0 | 1 | 0 | 1 | 1 | 0 | 0 | 1 |
| VNov | Bucbuc | 1 | 0 | 1 | 0 | 1 | 0 | 1 | 0 | 1 | 0 | 0 |
| VNov | Bursim | 1 | 0 | 1 | 0 | 1 | 0 | 1 | 0 | 0 | 0 | 0 |
| VNov | Capind | 0 | 0 | 0 | 0 | 1 | 0 | 0 | 1 | 0 | 0 | 0 |
| VNov | Casgau | 1 | 0 | 1 | 0 | 0 | 0 | 0 | 1 | 0 | 0 | 0 |
| VNov | Cecpel | 1 | 0 | 0 | 0 | 0 | 0 | 1 | 0 | 0 | 0 | 0 |
| VNov | Cocref | 1 | 0 | 0 | 0 | 1 | 0 | 1 | 0 | 0 | 0 | 1 |
| VNov | Croarb | 1 | 0 | 0 | 0 | 1 | 0 | 0 | 0 | 0 | 0 | 0 |
| VNov | Denarb | 1 | 0 | 1 | 0 | 1 | 0 | 0 | 1 | 0 | 0 | 0 |
| VNov | Drylat | 1 | 0 | 1 | 0 | 1 | 0 | 1 | 0 | 0 | 0 | 1 |
| VNov | Hamtri | 0 | 0 | 0 | 0 | 0 | 0 | 0 | 0 | 0 | 0 | 0 |
| VNov | Jatgau | 1 | 0 | 0 | 1 | 1 | 0 | 0 | 1 | 0 | 0 | 0 |

|      |        |   |   |   |   |   |   |   |   |   |   |   |
|------|--------|---|---|---|---|---|---|---|---|---|---|---|
| VNov | Loncas | 1 | 0 | 0 | 0 | 1 | 0 | 0 | 1 | 0 | 0 | 0 |
| VNov | Longua | 1 | 0 | 1 | 1 | 1 | 0 | 1 | 1 | 0 | 0 | 0 |
| VNov | Manzap | 1 | 0 | 1 | 1 | 1 | 1 | 1 | 0 | 0 | 0 | 0 |
| VNov | Matopp | 1 | 0 | 0 | 1 | 0 | 0 | 0 | 0 | 0 | 0 | 0 |
| VNov | Metbro | 1 | 0 | 1 | 0 | 1 | 0 | 1 | 1 | 0 | 0 | 1 |
| VNov | Mosdep | 1 | 0 | 0 | 0 | 0 | 0 | 1 | 1 | 0 | 0 | 1 |
| VNov | Necsal | 1 | 0 | 1 | 0 | 1 | 0 | 1 | 0 | 0 | 0 | 0 |
| VNov | Pispis | 1 | 0 | 1 | 0 | 1 | 0 | 0 | 1 | 0 | 0 | 0 |
| VNov | Poucam | 1 | 0 | 0 | 0 | 1 | 0 | 0 | 1 | 0 | 0 | 0 |
| VNov | Procop | 1 | 0 | 0 | 0 | 1 | 0 | 0 | 0 | 0 | 0 | 0 |
| VNov | Ranlon | 1 | 0 | 0 | 0 | 0 | 0 | 1 | 0 | 0 | 0 | 0 |
| VNov | Simsal | 1 | 0 | 0 | 0 | 1 | 0 | 0 | 0 | 0 | 0 | 0 |
| VNov | Vitgau | 1 | 0 | 0 | 0 | 1 | 0 | 0 | 0 | 0 | 0 | 0 |

Acronym of the species: *Acacia centralis* (Acacen), *Acacia cornigera* (Acacor), *Acacia gaumeri* (Acagau), *Allophylus cominia* (Allcom), *Amyris elemifera* (Amyele), *Annona reticulata* (Annret), *Aspidosperma desmanthum* (Aspdess), *Astronium graveolens* (Astgra), *Bauhinia divaricate* (Baudiv), *Bravaisia berlandieriana* (Braber), *Brosimum alicastrum* (Broali), *Bucida buceras* (Bucbuc), *Bursera simaruba* (Bursim), *Caesalpinia mollis* (Caemol), *Capparis indica* (Capind), *Cascabela gaumeri* (Cagau), *Cecropia peltate* (Cecpel), *Celtis trinervia* (Celtri), *Coccoloba cozumelensis* (Coccoz), *Coccoloba reflexiflora* (Cocref), *Coccoloba spicata* (Cocspi), *Cordia alliodora* (Corall), *Cosmocalyx spectabilis* (Cosspe), *Croton arboreus* (Croarb), *Croton icche* (Croicc), *Croton peraeeruginosus* (Croper), *Cupania belizensis* (Cupbel), *Dendropanax arboreus* (Denarb), *Diospyros salicifolia* (Diosal), *Diospyros yatesiana* (Dioyat), *Drypetes lateriflora* (Drylat), *Erythroxylum rotundifolium* (Eryrot), *Esenbeckia berlandieri* (Eseber), *Eugenia ibarrae* (Eugiba), *Eugenia winzerlingii* (Eugwin), *Exostema caribaeum* (Exocar), *Exothea diphylla* (Exodip), *Guaiacum sanctum* (Guasan), *Guettarda combsii* (Guecom), *Guettarda gaumeri* (Guegau), *Gymnopodium floribundum* (Gymflo), *Hampea trilobata* (Hamtri), *Handroanthus chrysanthus* (Hanchr), *Jatropha gaumeri* (Jatgau), *Krugiodendron ferreum* (Krufer), *Licaria coriacea* (Liccor), *Lonchocarpus castilloi* (Loncas), *Lonchocarpus guatemalensis* (Longua), *Lonchocarpus rugosus* (Lonrug), *Lonchocarpus yucatanensis* (Lonyuc), *Lysiloma latisiliquum* (Lyslat), *Manilkara zapota* (Manzap), *Matayba oppositifolia* (Matopp), *Melicoccus oliviformis* (Meloli), *Metopium brownie* (Metbro), *Mosannona depressa* (Mosdep), *Myrciaria floribunda* (Myrflo), *Nectandra salicifolia* (Necsal), *Neea choriophylla* (Neecho), *Neomillspaughia emarginata* (Neoema), *Pimenta dioica* (Pimdio), *Piscidia piscipula* (Pispis), *Pouteria amygdalina* (Pouamy), *Pouteria campechiana* (Poucam), *Pouteria reticulata* (Pouret), *Protium copal* (Procop), *Pseudobombax ellipticum* (Pseell), *Pseudolmedia spuria* (Psespu), *Randia longiloba* (Ranlon), *Sebastiania adenophora* (Sebade),



*Sideroxylon floribundum* (Sidflo), *Sideroxylon obtusifolium* (Sidobt), *Sideroxylon salicifolium* (Sidsal), *Simarouba amara* (Simama), *Simira salvadorensis* (Simsal), *Spondias mombin* (Spomom), *Swartzia cubensis* (Swacub), *Thouinia paucidentata* (Thopau), *Trichilia glabra* (Trigla), *Trichilia havanensis* (Trihav), *Trichilia minutiflora* (Trimin), *Trophis racemosa* (Trorac), *Vitex gaumeri* (Vitgau), *Zuelania guidonia* (Zuegui).
