# Supplementary material for: Linking Anthropogenic Landscape Perturbation to Herbivory and Pathogen Leaf Damage in Tropical Tree Communities
Source: MDPI journal article supplement (doi:10.3390/plants12223839), 2023-11-13
Supplement: s1 [file s1]

**Table S1.** Pearson's correlation coefficient quantifying the relationship between the landscape attributes and the first axis resulting from ordinations (NMDS) regarding different group-level of predictors and spatial scales.

|            | Spatial scale                |              |              |
|------------|------------------------------|--------------|--------------|
|            | 1000 m                       | 3000 m       | 5000 m       |
| Attributes | Composition                  |              |              |
| SFo        | <b>1.00</b>                  | <b>0.99</b>  | <b>-0.84</b> |
| TFo        | -0.04                        | -0.21        | -0.37        |
| SFo*       | <b>-0.75</b>                 | <b>-0.77</b> | <b>0.99</b>  |
| AFi        | <b>-0.75</b>                 | <b>-0.72</b> | <b>-0.87</b> |
|            | Area-Shape <sub>SEF</sub>    |              |              |
| Area       | <b>-0.85</b>                 | <b>0.59</b>  | <b>0.95</b>  |
| ED         | <b>0.86</b>                  | <b>-0.75</b> | <b>0.86</b>  |
| Shape      | <b>0.62</b>                  | 0.20         | <b>-0.76</b> |
|            | Configuration <sub>SEF</sub> |              |              |
| CLUMPY     | <b>-0.78</b>                 | 0.37         | 0.11         |
| IJI        | -0.38                        | <b>-0.89</b> | <b>-0.88</b> |
| MESH       | <b>0.91</b>                  | <b>0.95</b>  | <b>0.92</b>  |
| ENN        | -0.43                        | <b>-0.62</b> | 0.00         |

Spatial scales: circular buffers of 1000, 3000 and 5000 m radius. Group-level of predictors: variation in the landscape composition (Composition), in the area and shape of semi-evergreen forest patches (Area-Shape<sub>SEF</sub>) and in the landscape configuration regarding semi-evergreen (Configuration<sub>SEF</sub>). Landscape attributes: considered as part of the group-level predictor "Composition", the percentage of landscape coverage regarding semi-evergreen forest (SFo), thorn forest (TFo), secondary semi-evergreen forest (SFo\*), and agricultural field (AFi); considered as part of the group-level predictor "Area-Shape<sub>SEF</sub>", the mean area (Area), shape index (Shape), edge density (ED) of semi-evergreen forest patches; and considered as part of the group-level predictor "Configuration<sub>SEF</sub>", the clumpiness index (CLUMPY), the interspersation and juxtaposition index (IJI), the mean nearest neighbour distance among patches (ENN) and the effective mesh size (MESH) regarding semi-evergreen forest patches. Significant correlations are displayed in bold font. More information about analyses are presented in the method section.
