# Supplementary material for: Linking Anthropogenic Landscape Perturbation to Herbivory and Pathogen Leaf Damage in Tropical Tree Communities
Source: MDPI journal article supplement (doi:10.3390/plants12223839), 2023-11-13
Supplement: s1 [file s1]

**Table S2.** Incidence of damage caused by different herbivorous guilds in the species studied at the research sites.

This data frame serves as the basis for various analyses, including interaction webs, non-metric multidimensional scaling (NMDS), and Generalized Linear Mixed Model (GLMM) analyses, all of which are aimed at understanding the patterns of herbivore damage across the plant community in our study.

| Plot | Species | Gall I. | Suckers M | Suckers S | Chewers | Miners | Scrapers |
|------|---------|---------|-----------|-----------|---------|--------|----------|
| Cao1 | Acacor  | 0       | 0         | 0         | 1       | 0      | 0        |
| Cao1 | Allcom  | 0       | 0         | 1         | 1       | 1      | 1        |
| Cao1 | Annret  | 0       | 0         | 1         | 1       | 1      | 1        |
| Cao1 | Bursim  | 0       | 1         | 1         | 0       | 0      | 1        |
| Cao1 | Eugiba  | 0       | 0         | 1         | 1       | 0      | 0        |
| Cao1 | Eugwin  | 0       | 1         | 1         | 1       | 1      | 0        |
| Cao1 | Guecom  | 0       | 0         | 1         | 1       | 1      | 1        |
| Cao1 | Loncas  | 0       | 1         | 1         | 1       | 0      | 1        |
| Cao1 | Lonrug  | 0       | 0         | 1         | 1       | 0      | 1        |
| Cao1 | Manzap  | 1       | 0         | 1         | 0       | 1      | 1        |
| Cao1 | Necsal  | 0       | 0         | 1         | 1       | 0      | 1        |
| Cao1 | Poucarn | 1       | 0         | 1         | 1       | 1      | 1        |
| Cao1 | Swacub  | 0       | 1         | 1         | 1       | 1      | 1        |
| Cao1 | Trigla  | 0       | 1         | 1         | 1       | 1      | 1        |
| Cao1 | Trorac  | 0       | 0         | 1         | 0       | 0      | 1        |
| Cao2 | Broali  | 0       | 1         | 1         | 1       | 1      | 0        |
| Cao2 | Drylat  | 0       | 0         | 1         | 1       | 0      | 1        |
| Cao2 | Eugiba  | 0       | 1         | 1         | 1       | 0      | 0        |
| Cao2 | Exodip  | 1       | 0         | 1         | 1       | 1      | 1        |
| Cao2 | Manzap  | 0       | 0         | 1         | 1       | 1      | 1        |
| Cao2 | Metbro  | 0       | 0         | 1         | 1       | 1      | 1        |
| Cao2 | Mosdep  | 1       | 1         | 1         | 1       | 1      | 1        |
| Cao2 | Pimdio  | 0       | 0         | 1         | 1       | 1      | 1        |

|      |        |   |   |   |   |   |   |
|------|--------|---|---|---|---|---|---|
| Cao2 | Pouamy | 0 | 0 | 1 | 1 | 1 | 0 |
| Cao2 | Poucam | 1 | 0 | 1 | 1 | 1 | 1 |
| Cao2 | Procop | 1 | 0 | 1 | 1 | 0 | 1 |
| Cao2 | Pseell | 0 | 0 | 1 | 0 | 1 | 1 |
| Cao2 | Psespu | 0 | 0 | 1 | 1 | 1 | 1 |
| Cao2 | Simama | 0 | 0 | 1 | 1 | 0 | 1 |
| CCol | Acagau | 0 | 0 | 0 | 1 | 1 | 1 |
| CCol | Coccoz | 0 | 0 | 1 | 1 | 1 | 1 |
| CCol | Croarb | 0 | 0 | 1 | 1 | 1 | 1 |
| CCol | Eugwin | 0 | 0 | 1 | 1 | 1 | 1 |
| CCol | Gymflo | 1 | 1 | 1 | 1 | 1 | 1 |
| CCol | Longua | 1 | 0 | 0 | 1 | 1 | 1 |
| CCol | Lyslat | 1 | 1 | 0 | 1 | 0 | 0 |
| CCol | Necsal | 0 | 1 | 1 | 1 | 0 | 1 |
| CCol | Thopau | 0 | 1 | 0 | 1 | 0 | 1 |
| CCol | Vitgau | 0 | 0 | 0 | 1 | 1 | 1 |
| CNor | Acagau | 0 | 0 | 0 | 0 | 0 | 1 |
| CNor | Broali | 0 | 0 | 0 | 1 | 0 | 1 |
| CNor | Bursim | 0 | 0 | 0 | 0 | 0 | 1 |
| CNor | Casgau | 0 | 0 | 1 | 1 | 1 | 0 |
| CNor | Cocref | 0 | 0 | 0 | 1 | 0 | 0 |
| CNor | Corall | 0 | 0 | 1 | 1 | 0 | 0 |
| CNor | Croicc | 0 | 0 | 1 | 0 | 1 | 1 |
| CNor | Diosal | 0 | 0 | 0 | 1 | 0 | 0 |
| CNor | Drylat | 0 | 0 | 1 | 1 | 0 | 0 |
| CNor | Eugiba | 0 | 0 | 1 | 1 | 1 | 0 |
| CNor | Guecom | 0 | 0 | 0 | 1 | 1 | 1 |
| CNor | Guegau | 0 | 0 | 0 | 0 | 0 | 1 |
| CNor | Gymflo | 0 | 0 | 0 | 1 | 1 | 1 |

|      |        |   |   |   |   |   |   |
|------|--------|---|---|---|---|---|---|
| CNor | Liccor | 0 | 0 | 1 | 1 | 0 | 0 |
| CNor | Longua | 0 | 0 | 1 | 1 | 1 | 0 |
| CNor | Lonyuc | 0 | 0 | 1 | 1 | 1 | 1 |
| CNor | Manzap | 1 | 0 | 0 | 1 | 1 | 0 |
| CNor | Mosdep | 0 | 1 | 0 | 1 | 1 | 1 |
| CNor | Necsal | 0 | 0 | 1 | 1 | 1 | 1 |
| CNor | Neoema | 0 | 0 | 0 | 1 | 1 | 0 |
| CNor | Pispis | 1 | 0 | 0 | 0 | 0 | 0 |
| CNor | Sebade | 0 | 0 | 1 | 0 | 0 | 0 |
| CNor | Thopau | 0 | 0 | 1 | 1 | 1 | 0 |
| CNor | Trihav | 0 | 0 | 0 | 1 | 0 | 0 |
| CNor | Vitgau | 1 | 0 | 0 | 1 | 0 | 1 |
| CNor | Zuegui | 0 | 0 | 1 | 1 | 1 | 1 |
| CRej | Allcom | 0 | 0 | 0 | 1 | 0 | 1 |
| CRej | Annret | 0 | 0 | 1 | 1 | 0 | 1 |
| CRej | Astgra | 0 | 1 | 1 | 1 | 1 | 0 |
| CRej | Broali | 1 | 0 | 1 | 1 | 0 | 1 |
| CRej | Celtri | 0 | 1 | 0 | 1 | 0 | 0 |
| CRej | Diosal | 1 | 0 | 0 | 1 | 0 | 0 |
| CRej | Drylat | 0 | 0 | 1 | 1 | 0 | 1 |
| CRej | Meloli | 0 | 1 | 1 | 0 | 0 | 0 |
| CRej | Neecho | 1 | 1 | 1 | 1 | 0 | 0 |
| CRej | Pouret | 0 | 0 | 1 | 1 | 1 | 0 |
| CRej | Simama | 0 | 0 | 1 | 1 | 0 | 0 |
| CRej | Vitgau | 0 | 0 | 0 | 1 | 0 | 0 |
| CRej | Zuegui | 0 | 0 | 0 | 1 | 0 | 1 |
| K120 | Bursim | 0 | 0 | 0 | 1 | 0 | 0 |
| K120 | Caemol | 0 | 0 | 1 | 0 | 0 | 1 |
| K120 | Croarb | 0 | 0 | 1 | 1 | 1 | 1 |

|      |         |   |   |   |   |   |   |
|------|---------|---|---|---|---|---|---|
| K120 | Croper  | 1 | 0 | 1 | 1 | 1 | 0 |
| K120 | Eseber  | 0 | 0 | 1 | 1 | 1 | 0 |
| K120 | Gymflo  | 0 | 1 | 1 | 1 | 1 | 1 |
| K120 | Longua  | 0 | 0 | 1 | 1 | 1 | 1 |
| K120 | Lonyuc  | 0 | 0 | 0 | 0 | 1 | 1 |
| K120 | Neoema  | 0 | 0 | 1 | 1 | 1 | 1 |
| NBe1 | Bauidv  | 1 | 0 | 0 | 1 | 0 | 1 |
| NBe1 | Broali  | 1 | 0 | 1 | 1 | 0 | 1 |
| NBe1 | Bursim  | 1 | 0 | 0 | 0 | 0 | 1 |
| NBe1 | Cosspe  | 0 | 0 | 0 | 1 | 0 | 1 |
| NBe1 | Krufer  | 0 | 0 | 1 | 1 | 1 | 1 |
| NBe1 | Loncas  | 0 | 1 | 0 | 1 | 0 | 0 |
| NBe1 | Mosdep  | 0 | 0 | 1 | 1 | 0 | 1 |
| NBe1 | Necsal  | 0 | 0 | 1 | 1 | 1 | 1 |
| NBe1 | Neecho  | 1 | 0 | 1 | 1 | 1 | 1 |
| NBe1 | Poucarn | 1 | 0 | 1 | 1 | 1 | 0 |
| NBe1 | Pouret  | 1 | 0 | 0 | 1 | 1 | 1 |
| NBe1 | Procop  | 1 | 0 | 1 | 1 | 0 | 1 |
| NBe1 | Pseell  | 0 | 0 | 0 | 1 | 1 | 1 |
| NBe1 | Psespu  | 1 | 0 | 1 | 1 | 0 | 0 |
| NBe1 | Ranlon  | 0 | 0 | 0 | 1 | 1 | 1 |
| NBe1 | Sidflo  | 1 | 0 | 1 | 1 | 1 | 0 |
| NBe1 | Sidobt  | 1 | 0 | 1 | 1 | 0 | 1 |
| NBe1 | Sidsal  | 0 | 0 | 1 | 1 | 1 | 0 |
| NBe1 | Trimin  | 1 | 0 | 1 | 1 | 1 | 1 |
| NBe2 | Bursim  | 0 | 0 | 1 | 1 | 1 | 1 |
| NBe2 | Casgau  | 0 | 0 | 1 | 1 | 0 | 1 |
| NBe2 | Cocspi  | 1 | 1 | 1 | 1 | 1 | 1 |
| NBe2 | Croarb  | 0 | 0 | 0 | 1 | 1 | 1 |

|      |         |   |   |   |   |   |   |
|------|---------|---|---|---|---|---|---|
| NBe2 | Denarb  | 0 | 0 | 1 | 1 | 0 | 1 |
| NBe2 | Guecom  | 0 | 0 | 0 | 1 | 0 | 1 |
| NBe2 | Longua  | 0 | 0 | 0 | 1 | 1 | 1 |
| NBe2 | Lyslat  | 1 | 0 | 0 | 1 | 0 | 1 |
| NBe2 | Necsal  | 0 | 0 | 1 | 1 | 0 | 0 |
| NBe2 | Poucarn | 0 | 0 | 1 | 1 | 0 | 1 |
| NBe2 | Thopau  | 0 | 0 | 0 | 1 | 1 | 1 |
| NBe2 | Vitgau  | 0 | 0 | 0 | 1 | 0 | 0 |
| RCa1 | Acagau  | 1 | 1 | 0 | 1 | 0 | 1 |
| RCa1 | Broali  | 0 | 1 | 1 | 1 | 1 | 1 |
| RCa1 | Casgau  | 0 | 0 | 1 | 0 | 0 | 1 |
| RCa1 | Drylat  | 0 | 1 | 1 | 1 | 1 | 1 |
| RCa1 | Eryrot  | 0 | 0 | 1 | 1 | 0 | 1 |
| RCa1 | Eugwin  | 0 | 0 | 1 | 1 | 1 | 1 |
| RCa1 | Gymflo  | 0 | 0 | 1 | 1 | 1 | 1 |
| RCa1 | Krufer  | 0 | 0 | 1 | 1 | 1 | 1 |
| RCa1 | Lonyuc  | 0 | 0 | 1 | 1 | 1 | 1 |
| RCa1 | Manzap  | 1 | 0 | 1 | 1 | 1 | 1 |
| RCa1 | Mosdep  | 0 | 0 | 1 | 1 | 1 | 1 |
| RCa1 | Thopau  | 1 | 0 | 1 | 1 | 1 | 1 |
| RCa2 | Acacen  | 0 | 0 | 1 | 1 | 1 | 1 |
| RCa2 | Amyele  | 0 | 0 | 1 | 1 | 0 | 0 |
| RCa2 | Broali  | 0 | 0 | 1 | 1 | 0 | 0 |
| RCa2 | Capind  | 0 | 0 | 1 | 1 | 1 | 0 |
| RCa2 | Croarb  | 1 | 0 | 1 | 0 | 1 | 1 |
| RCa2 | Drylat  | 0 | 0 | 1 | 1 | 0 | 0 |
| RCa2 | Eseber  | 0 | 1 | 1 | 1 | 1 | 0 |
| RCa2 | Eugiba  | 0 | 0 | 1 | 1 | 1 | 0 |
| RCa2 | Eugwin  | 0 | 0 | 1 | 0 | 0 | 0 |

|      |         |   |   |   |   |   |   |
|------|---------|---|---|---|---|---|---|
| RCa2 | Exodip  | 0 | 0 | 1 | 1 | 1 | 0 |
| RCa2 | Guasan  | 0 | 0 | 0 | 0 | 1 | 1 |
| RCa2 | Krufer  | 0 | 0 | 1 | 1 | 1 | 0 |
| RCa2 | Longua  | 0 | 0 | 1 | 0 | 1 | 0 |
| RCa2 | Lonyuc  | 0 | 0 | 1 | 0 | 1 | 0 |
| RCa2 | Manzap  | 1 | 0 | 1 | 1 | 1 | 1 |
| RCa2 | Mosdep  | 0 | 0 | 1 | 1 | 0 | 1 |
| RCa2 | Neecho  | 0 | 0 | 1 | 0 | 1 | 0 |
| RCa2 | Thopau  | 0 | 0 | 1 | 1 | 1 | 0 |
| RCa3 | Aspdes  | 0 | 0 | 0 | 1 | 0 | 1 |
| RCa3 | Eugiba  | 1 | 1 | 1 | 1 | 1 | 1 |
| RCa3 | Exocar  | 0 | 0 | 1 | 1 | 1 | 1 |
| RCa3 | Hanchr  | 0 | 0 | 0 | 1 | 0 | 1 |
| RCa3 | Manzap  | 1 | 0 | 1 | 1 | 1 | 1 |
| RCa3 | Mosdep  | 1 | 0 | 1 | 1 | 1 | 1 |
| RCa3 | Myrflo  | 0 | 0 | 1 | 1 | 1 | 1 |
| RCa3 | Pouamy  | 1 | 0 | 1 | 1 | 1 | 1 |
| RCa3 | Poucarn | 0 | 0 | 1 | 1 | 1 | 1 |
| RCa3 | Pouret  | 1 | 0 | 1 | 1 | 1 | 1 |
| RCa3 | Psespu  | 0 | 0 | 1 | 1 | 0 | 1 |
| RCa3 | Trimin  | 0 | 0 | 1 | 1 | 0 | 1 |
| RCa3 | Vitgau  | 0 | 0 | 0 | 1 | 0 | 1 |
| SRos | Bauidv  | 1 | 0 | 0 | 1 | 0 | 1 |
| SRos | Bursim  | 0 | 0 | 1 | 1 | 1 | 1 |
| SRos | Cupbel  | 0 | 0 | 0 | 1 | 0 | 1 |
| SRos | Denarb  | 1 | 0 | 1 | 1 | 1 | 1 |
| SRos | Dioyat  | 0 | 0 | 0 | 1 | 1 | 1 |
| SRos | Drylat  | 0 | 1 | 1 | 1 | 0 | 1 |
| SRos | Eryrot  | 0 | 1 | 1 | 1 | 1 | 1 |

|      |        |   |   |   |   |   |   |
|------|--------|---|---|---|---|---|---|
| SRos | Guecom | 0 | 1 | 1 | 1 | 1 | 1 |
| SRos | Longua | 0 | 0 | 1 | 1 | 0 | 1 |
| SRos | Mosdep | 0 | 0 | 1 | 1 | 1 | 1 |
| SRos | Necsal | 0 | 1 | 1 | 1 | 1 | 0 |
| SRos | Pispis | 1 | 0 | 0 | 1 | 1 | 1 |
| SRos | Sidsal | 0 | 0 | 1 | 1 | 1 | 1 |
| SRos | Swacub | 0 | 0 | 1 | 1 | 1 | 1 |
| SRos | Trigla | 1 | 0 | 1 | 1 | 1 | 1 |
| VNov | Acacen | 0 | 1 | 0 | 0 | 0 | 0 |
| VNov | Acagau | 0 | 0 | 0 | 0 | 0 | 1 |
| VNov | Allcom | 0 | 0 | 0 | 1 | 0 | 0 |
| VNov | Braber | 0 | 0 | 1 | 0 | 0 | 0 |
| VNov | Broali | 1 | 0 | 1 | 1 | 0 | 0 |
| VNov | Bucbuc | 0 | 0 | 0 | 1 | 0 | 0 |
| VNov | Bursim | 0 | 0 | 1 | 1 | 1 | 0 |
| VNov | Capind | 1 | 0 | 0 | 0 | 0 | 0 |
| VNov | Casgau | 0 | 0 | 1 | 0 | 1 | 0 |
| VNov | Cecpel | 0 | 0 | 0 | 1 | 0 | 0 |
| VNov | Cocref | 0 | 1 | 0 | 1 | 1 | 1 |
| VNov | Croarb | 0 | 0 | 1 | 1 | 0 | 0 |
| VNov | Denarb | 0 | 0 | 0 | 0 | 1 | 0 |
| VNov | Drylat | 0 | 0 | 1 | 1 | 1 | 0 |
| VNov | Hamtri | 0 | 0 | 0 | 1 | 1 | 0 |
| VNov | Jatgau | 1 | 0 | 1 | 0 | 0 | 0 |
| VNov | Longua | 0 | 0 | 1 | 1 | 1 | 0 |
| VNov | Manzap | 1 | 0 | 0 | 1 | 1 | 0 |
| VNov | Matopp | 0 | 0 | 0 | 1 | 1 | 0 |
| VNov | Metbro | 0 | 0 | 0 | 0 | 0 | 1 |
| VNov | Mosdep | 0 | 0 | 1 | 1 | 1 | 0 |

|      |         |   |   |   |   |   |   |
|------|---------|---|---|---|---|---|---|
| VNov | Necsal  | 0 | 0 | 1 | 1 | 1 | 0 |
| VNov | Pispis  | 1 | 0 | 0 | 1 | 0 | 0 |
| VNov | Poucarn | 1 | 0 | 0 | 1 | 0 | 0 |
| VNov | Procop  | 1 | 0 | 1 | 1 | 0 | 0 |
| VNov | Ranlon  | 0 | 0 | 0 | 0 | 1 | 0 |
| VNov | Vitgau  | 0 | 0 | 0 | 1 | 0 | 0 |

Acronym of the species: *Acacia centralis* (Acacen), *Acacia cornigera* (Acacor), *Acacia gaumeri* (Acagau), *Allophylus cominia* (Allcom), *Amyris elemifera* (Amyele), *Annona reticulata* (Annret), *Aspidosperma desmanthum* (Aspdess), *Astronium graveolens* (Astgra), *Bauhinia divaricate* (Baudiv), *Bravaisia berlandieriana* (Braber), *Brosimum alicastrum* (Broali), *Bucida buceras* (Bucbuc), *Bursera simaruba* (Bursim), *Caesalpinia mollis* (Caemol), *Capparis indica* (Capind), *Cascabela gaumeri* (Cascgau), *Cecropia peltate* (Cecpel), *Celtis trinervia* (Celtri), *Coccoloba cozumelensis* (Coccoz), *Coccoloba reflexiflora* (Cocref), *Coccoloba spicata* (Cocspi), *Cordia alliodora* (Corall), *Cosmocalyx spectabilis* (Cosspe), *Croton arboreus* (Croarb), *Croton icche* (Croicc), *Croton peraruginosus* (Croper), *Cupania belizensis* (Cupbel), *Dendropanax arboreus* (Denarb), *Diospyros salicifolia* (Diosal), *Diospyros yatesiana* (Dioyat), *Drypetes lateriflora* (Drylat), *Erythroxylum rotundifolium* (Eryrot), *Esenbeckia berlandieri* (Eseber), *Eugenia ibarrae* (Eugiba), *Eugenia winzerlingii* (Eugwin), *Exostema caribaeum* (Exocar), *Exothea diphylla* (Exodip), *Guaiacum sanctum* (Guasan), *Guettarda combsii* (Guecom), *Guettarda gaumeri* (Guegau), *Gymnopodium floribundum* (Gymflo), *Hampea trilobata* (Hamtri), *Handroanthus chrysanthus* (Hanchr), *Jatropha gaumeri* (Jatgau), *Krugiodendron ferreum* (Krufer), *Licaria coriacea* (Liccor), *Lonchocarpus castilloi* (Loncas), *Lonchocarpus guatemalensis* (Longua), *Lonchocarpus rugosus* (Lonrug), *Lonchocarpus yucatanensis* (Lonyuc), *Lysiloma latisiliquum* (Lyslat), *Manilkara zapota* (Manzap), *Matayba oppositifolia* (Matopp), *Melicoccus oliviformis* (Meloli), *Metopium brownie* (Metbro), *Mosannonna depressa* (Mosdep), *Myrciaria floribunda* (Myrflo), *Nectandra salicifolia* (Necsal), *Neea choriophylla* (Neecho), *Neomillspaughia emarginata* (Neoema), *Pimenta dioica* (Pimdio), *Piscidia piscipula* (Pispis), *Pouteria amygdalina* (Pouamy), *Pouteria campechiana* (Poucarn), *Pouteria reticulata* (Pouret), *Protium copal* (Procop), *Pseudobombax ellipticum* (Pseell), *Pseudolmedia spuria* (Psespu), *Randia longiloba* (Ranlon), *Sebastiania adenophora* (Sebade), *Sideroxylon floribundum* (Sidflo), *Sideroxylon obtusifolium* (Sidobt), *Sideroxylon salicifolium* (Sidsal), *Simarouba amara* (Simama), *Simira salvadorensis* (Simsal), *Spondias mombin* (Spomom), *Swartzia cubensis* (Swacub), *Thouinia paucidentata* (Thopau), *Trichilia glabra* (Trigla), *Trichilia havanensis* (Trihav), *Trichilia minutiflora* (Trimin), *Trophis racemosa* (Trorac), *Vitex gaumeri* (Vitgau), *Zuelania guidonia* (Zuegui).
