# Supplementary material for: Linking Anthropogenic Landscape Perturbation to Herbivory and Pathogen Leaf Damage in Tropical Tree Communities
Source: Plants (Basel). 2023 Nov 13;12(22):3839. doi: 10.3390/plants12223839 (PMC10675074; doi:10.3390/plants12223839)
Supplement: Supplementary file 1 [file plants-12-03839-s001.zip]

Archive with 4 entries (4 files):
- Fig. S1 Interaction networks between tree species, herbivorous and symptoms.tif
- Table S1 Correlation between landscape attributes and ordinations axis.pdf
- Table S2 Incidence of damage caused by herbivores in the studied species.pdf
- Table S3 Incidence of symptoms related to pathogens in the studied species.pdf
